# Supplementary material for: Fabrication, characterization and electrochemical analysis of a polyvinylidene fluoride plus zeolite embedded manganese phosphate composite ion exchange membrane
Source: Royal Society of Chemistry journal article supplement (doi:10.1039/d5cp00088b), 2025-01-01
Supplement: d5cp00088b1.pdf [file d5cp00088b1.pdf]

## Supporting information file

### **Fabrication, characterization and electrochemical analysis of polyvinylidene fluoride plus zeolites embedded manganese phosphate composite ion exchange membrane**

Mohd Arsalan<sup>1</sup>, Mohd Adeel Khan<sup>1</sup>, Rhithuparna D.<sup>2</sup>, Wasi Ur Rahman<sup>3</sup>, Mohamed Fahad Alajmi<sup>4</sup>, Afzal Hussain<sup>4</sup>, Gopinath Halder<sup>2\*</sup>

<sup>1</sup>Department of Applied Chemistry, Aligarh Muslim University Aligarh-India

<sup>2</sup>Department of Chemical Engineering, National Institute of Technology Durgapur, Durgapur-West Bengal, 713209, India

<sup>3</sup>Department of Chemical Engineering, Aligarh Muslim University Aligarh-India

<sup>4</sup>Department of Pharmacognosy, College of Pharmacy, King Saud University, Riyadh, KSA.

**Corresponding author:** E-mail: [gopinath.halder@che.nitdgp.ac.in](mailto:gopinath.halder@che.nitdgp.ac.in)

### **Table of contents:**

| <b>Sl. No</b> | <b>Content</b>                                                                                                    |         |
|---------------|-------------------------------------------------------------------------------------------------------------------|---------|
| 1.            | <b>Fig. S1:</b> (a) Composite casting die and (b) hydraulic press apparatus used in the preparation of PVDF+Ze@MP | Fig. S1 |

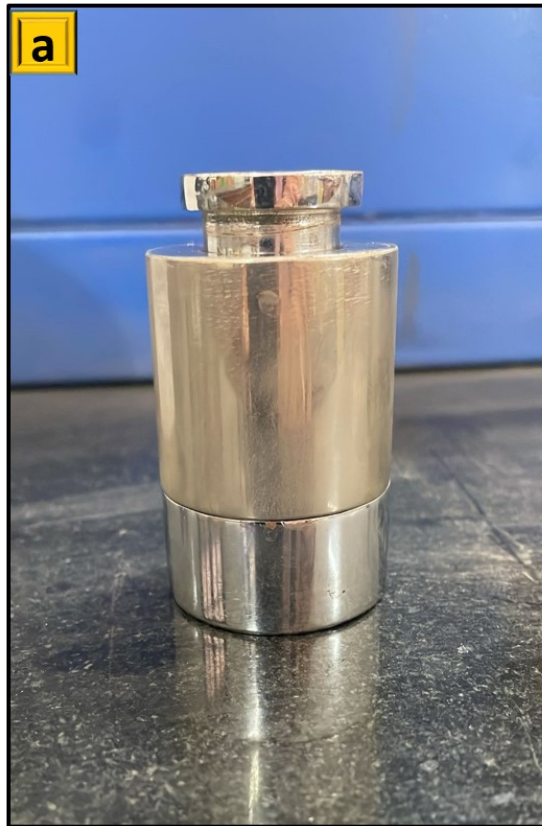

**Composite casting die**

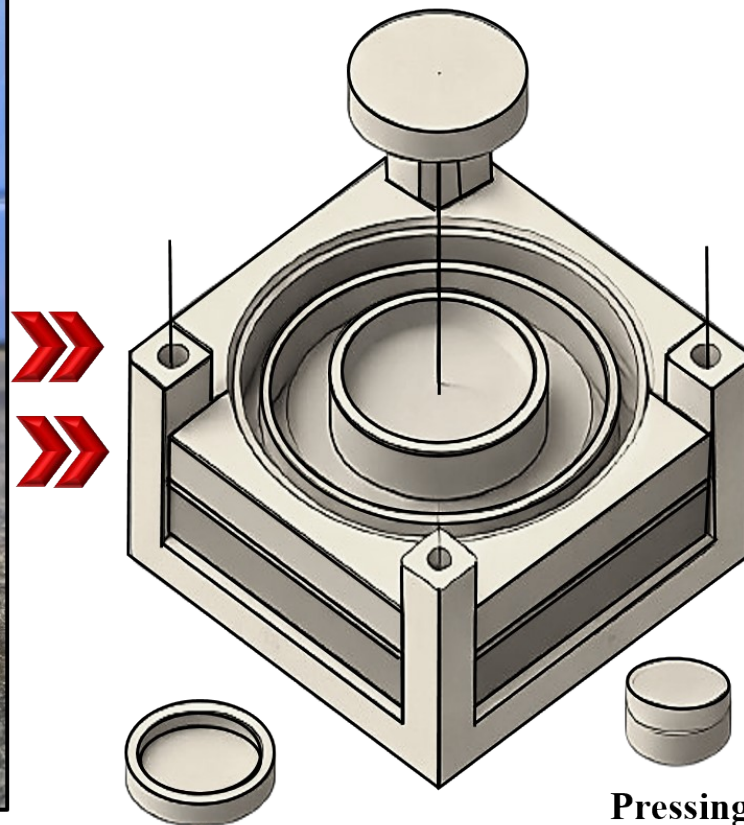

**Pressing thickness**

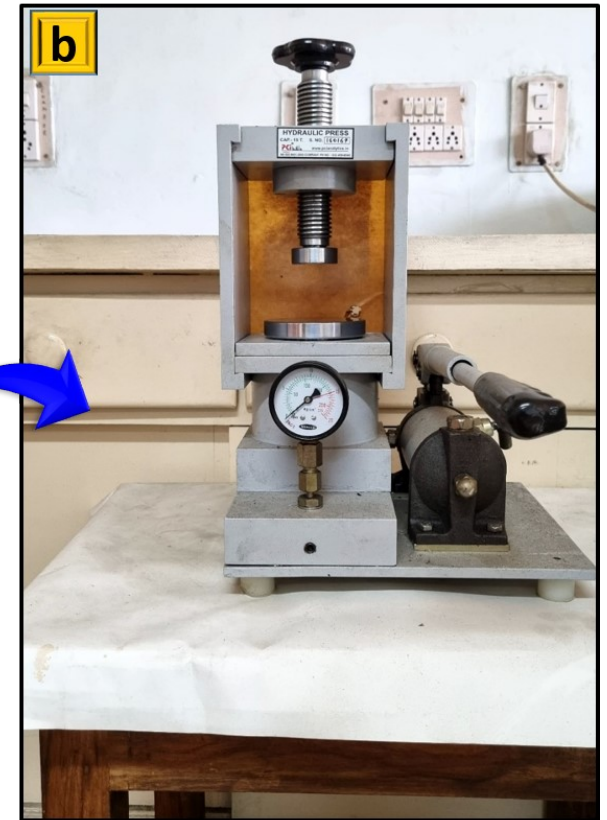

**Hydraulic press**

**Fig. S1: (a) Composite casting die and (b) hydraulic press apparatus used in the preparation of PVDF+Ze@MP**
